# Supplementary material for: Population health and health sector cost impacts of the UK Soft Drinks Industry Levy: a modelling study
Source: bioRxiv or medRxiv preprint supplement (doi:10.1101/2023.10.05.23296619), 2023-10-07
Supplement: Supplementary file [file media-1.pdf]

## Text S1 – PRIMETIME data inputs

|                                                                  |    |
|------------------------------------------------------------------|----|
| 1. Population numbers .....                                      | 2  |
| 2. All-cause mortality rates .....                               | 3  |
| 3. Background trends in overweight and obesity .....             | 4  |
| 4. Dental caries rates .....                                     | 5  |
| 5. Disease incidence rates.....                                  | 6  |
| 6. Disease case fatality rates.....                              | 7  |
| 7. Disease prevalence .....                                      | 8  |
| 8. Background trends in disease incidence and case fatality..... | 9  |
| 9. Relative risks of disease .....                               | 10 |
| 10. Utility weights .....                                        | 12 |
| 11. Disease costs.....                                           | 13 |

## 1. Population numbers

Table S1 UK population by age and sex from the Human Mortality Database<sup>1</sup> (all ages in 2015) and population projections from the Office for National Statistics<sup>2</sup> (future 0-4 year olds)

| Age group (years) | Year0* | Starting population |           |
|-------------------|--------|---------------------|-----------|
|                   |        | Male                | Female    |
| 0-4               | 2050   | 2,088,536           | 1,990,411 |
| 0-4               | 2045   | 2,069,673           | 1,972,502 |
| 0-4               | 2040   | 1,999,663           | 1,905,857 |
| 0-4               | 2035   | 1,953,494           | 1,861,924 |
| 0-4               | 2030   | 1,968,036           | 1,875,882 |
| 0-4               | 2025   | 1,994,735           | 1,901,451 |
| 0-4               | 2020   | 2,006,190           | 1,910,568 |
| 0-4               | 2015   | 2,063,050           | 1,963,632 |
| 5-9               | 2015   | 1,999,632           | 1,907,222 |
| 10-14             | 2015   | 1,809,767           | 1,725,856 |
| 15-19             | 2015   | 1,970,469           | 1,866,308 |
| 20-24             | 2015   | 2,191,121           | 2,113,257 |
| 25-29             | 2015   | 2,213,208           | 2,203,621 |
| 30-34             | 2015   | 2,171,167           | 2,197,785 |
| 35-39             | 2015   | 2,009,195           | 2,027,365 |
| 40-44             | 2015   | 2,149,871           | 2,195,049 |
| 45-49             | 2015   | 2,292,536           | 2,359,142 |
| 50-54             | 2015   | 2,227,216           | 2,284,486 |
| 55-59             | 2015   | 1,924,116           | 1,972,675 |
| 60-64             | 2015   | 1,716,700           | 1,789,959 |
| 65-69             | 2015   | 1,742,943           | 1,845,273 |
| 70-74             | 2015   | 1,273,261           | 1,406,103 |
| 75-79             | 2015   | 985,818             | 1,165,295 |
| 80-84             | 2015   | 671,986             | 903,785   |
| 85-89             | 2015   | 366,304             | 604,483   |
| 90-94             | 2015   | 134,860             | 309,232   |
| 95-100            | 2015   | 22,305              | 82,158    |

\* Year0 reflects the year in which future cohorts enter the PRIMETIME model simulation.

## 2. All-cause mortality rates

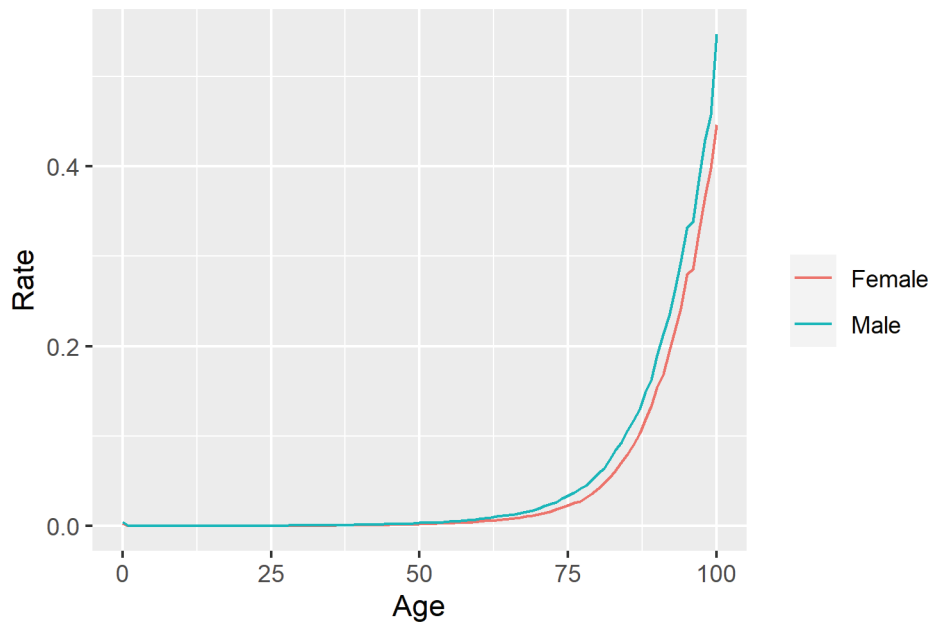

Figure S1 UK all-cause mortality, by single year of age and sex, from the Human Mortality Database.<sup>1</sup>

### 3. Background trends in overweight and obesity

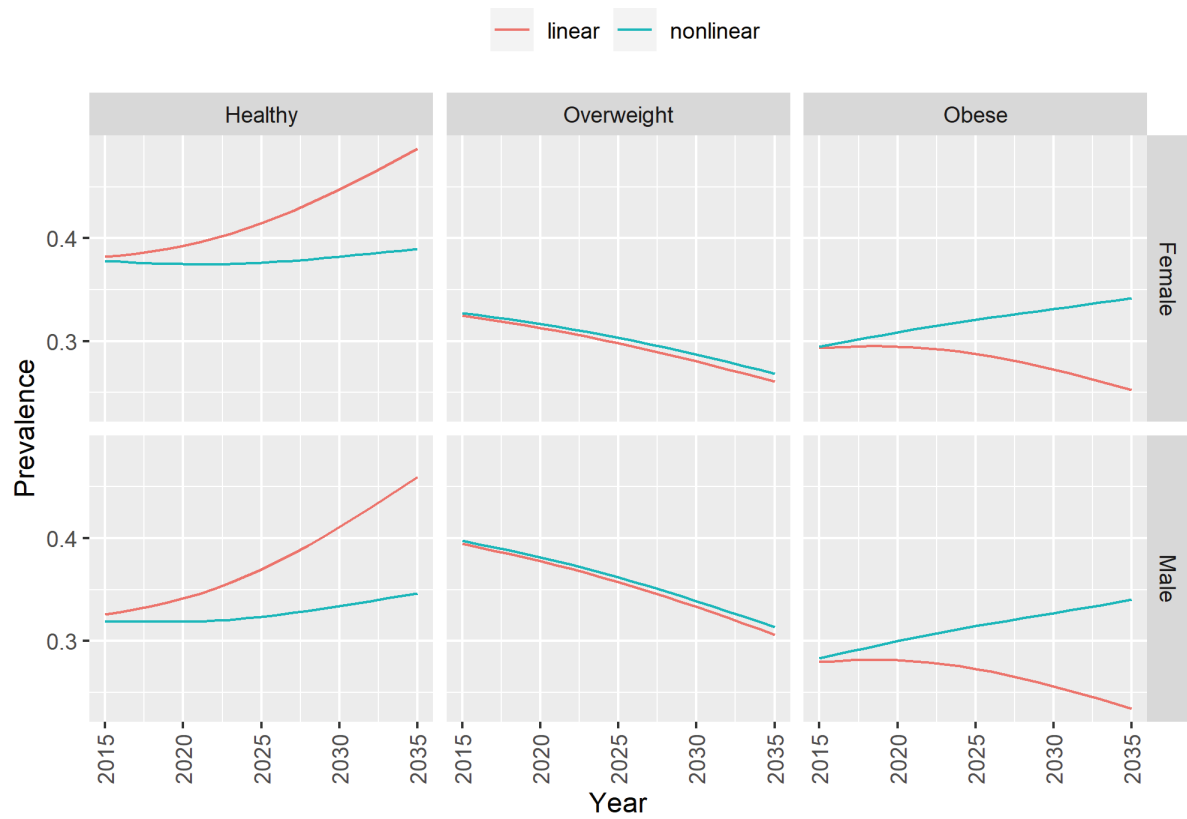

Figure S2 Predicted trends in overweight and obesity with non-linear (base case) and linear (sensitivity) models from Cobiac et al.<sup>3</sup>

#### 4. Dental caries rates

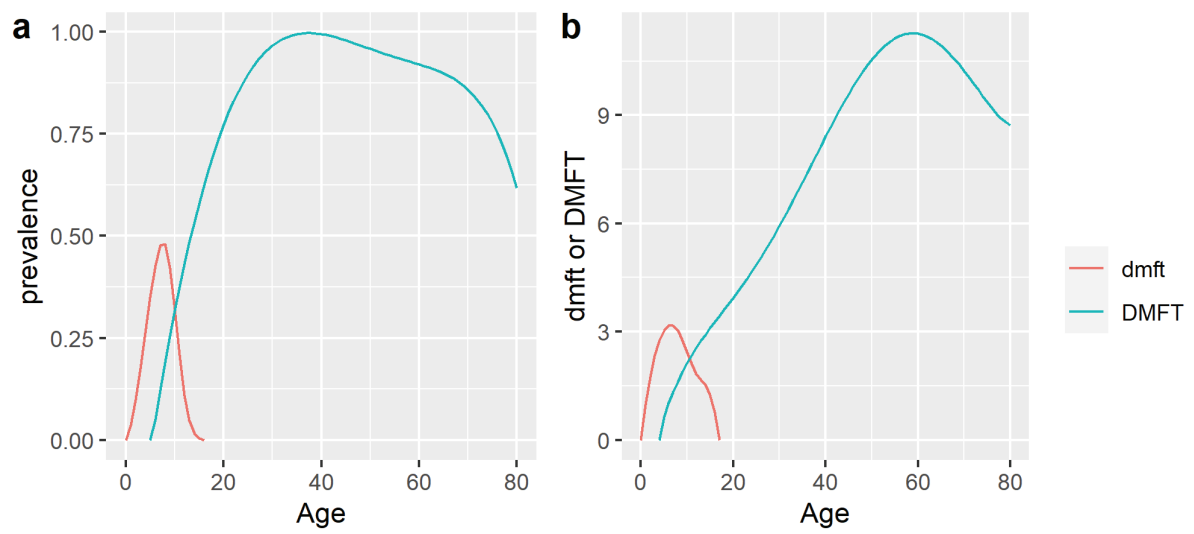

Figure S3 (a) prevalence of and (b) mean number of decayed, missing and filled teeth that are deciduous (dmft) and permanent (DMFT); derived from data collected in the Child and Adult Dental Health Surveys,<sup>4,5</sup> adjusted for congenital tooth absence,<sup>6</sup> and causes of tooth extraction.<sup>7,8</sup>

## 5. Disease incidence rates

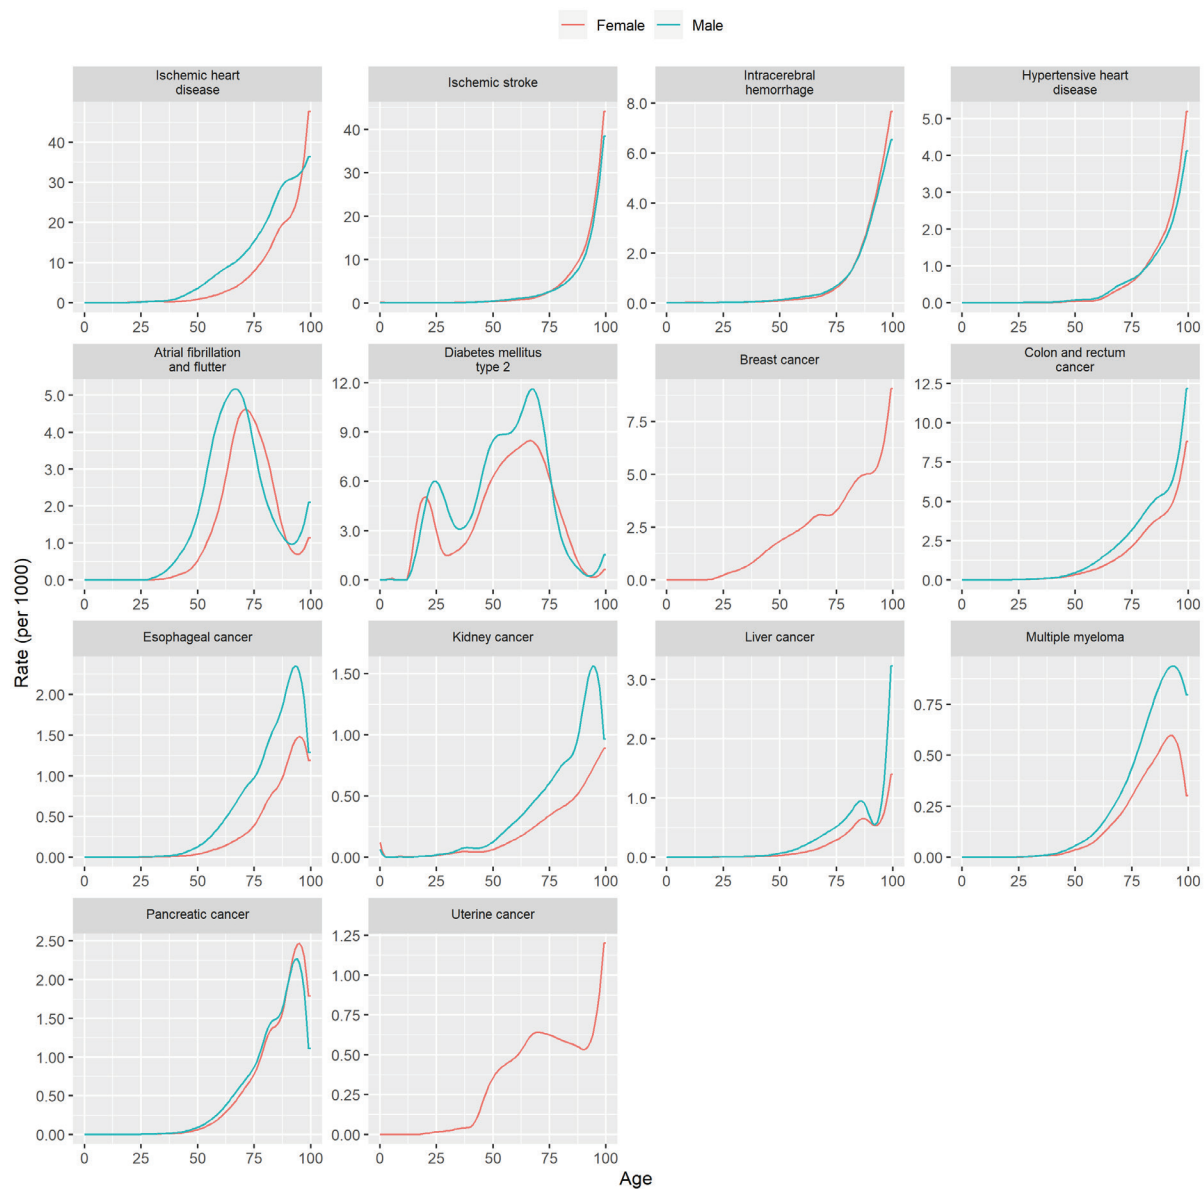

Figure S4 Incidence rates, derived from Global Burden of Disease<sup>9</sup> estimates using disbayes.<sup>10</sup> (NB. Graphs are presented on different scales to show detail, but in some cases this may give an exaggerated appearance of variability across ages.

## 6. Disease case fatality rates

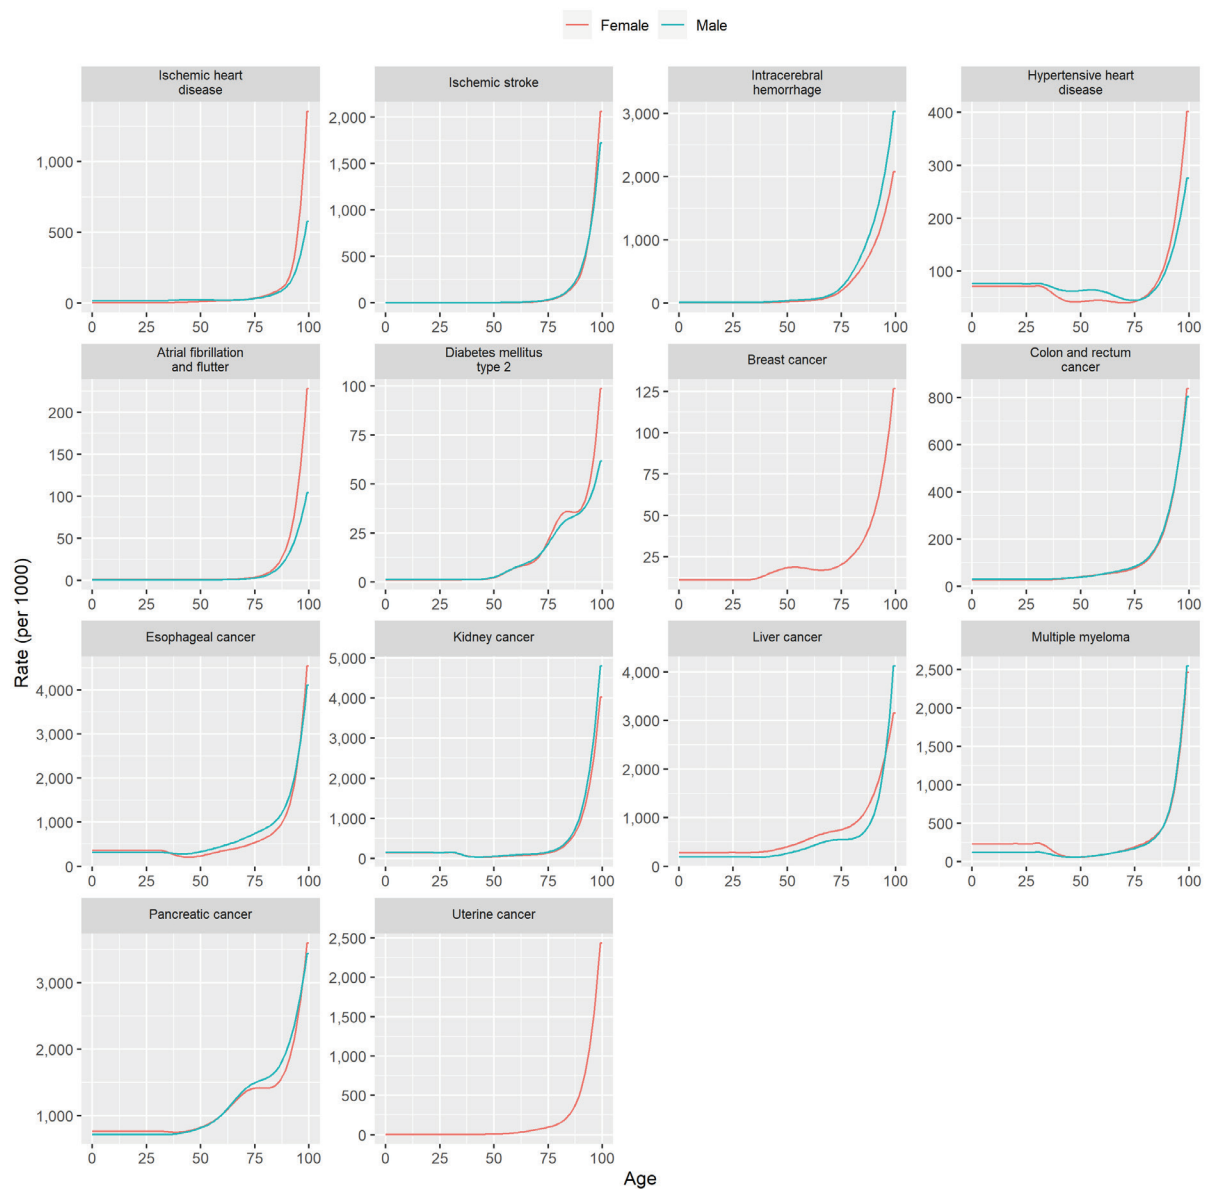

Figure S5 Case fatality rates, derived from Global Burden of Disease<sup>9</sup> estimates using disbayes.<sup>10</sup>

## 7. Disease prevalence

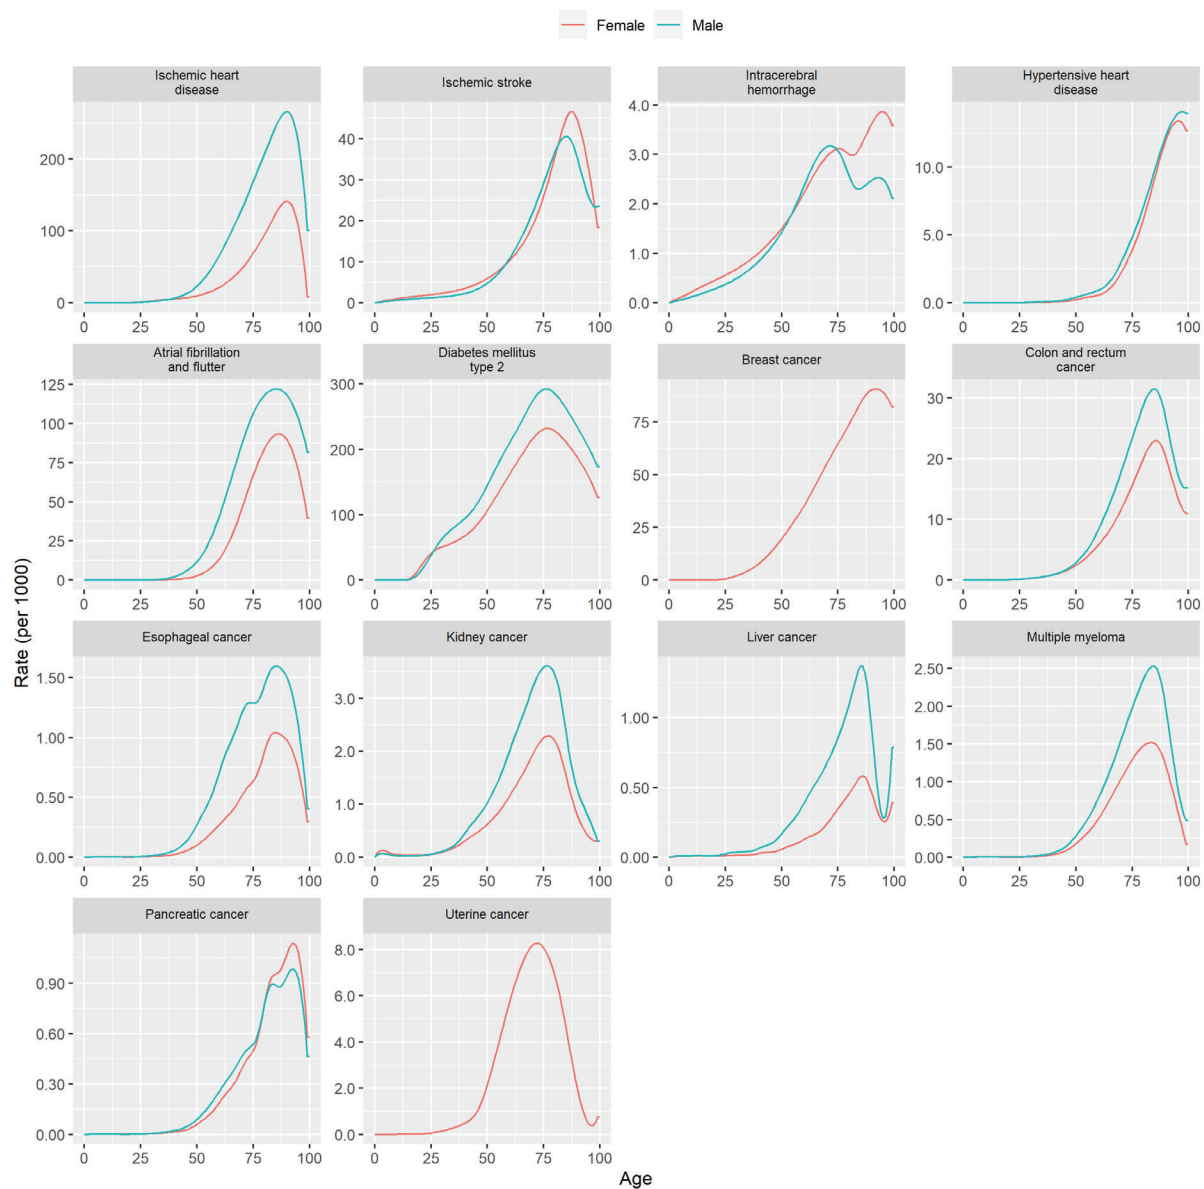

Figure S6 Starting prevalence rates, derived from Global Burden of Disease<sup>9</sup> estimates using disbayes.<sup>10</sup>



## 8. Background trends in disease incidence and case fatality

Table S2 Annual trends in incidence rates, by sex and age group

| Cause                           | Male    |         |         | Female  |         |         |
|---------------------------------|---------|---------|---------|---------|---------|---------|
|                                 | 0-34    | 35-64   | 65+     | 0-34    | 35-64   | 65+     |
| Ischaemic heart disease         | 0.0052  | 0.0013  | -0.0205 | -0.0030 | 0.0007  | -0.0156 |
| Ischaemic stroke                | 0.0033  | -0.0172 | -0.0320 | -0.0007 | -0.0180 | -0.0318 |
| Intracerebral haemorrhage       | -0.0051 | -0.0202 | -0.0041 | -0.0091 | -0.0203 | -0.0121 |
| Hypertensive heart disease      | 0.0185  | -0.0027 | 0.0034  | 0.0086  | 0.0028  | 0.0037  |
| Atrial fibrillation and flutter | 0.0069  | 0.0142  | 0.0023  | 0.0069  | 0.0120  | -0.0019 |
| Diabetes mellitus type 2        | 0.0379  | 0.0261  | 0.0220  | 0.0376  | 0.0303  | 0.0131  |
| Breast cancer                   | 0.0112  | -0.0073 | 0.0042  | NA      | NA      | NA      |
| Colon and rectum cancer         | 0.0359  | 0.0013  | 0.0008  | 0.0295  | 0.0003  | -0.0021 |
| Oesophageal cancer              | 0.0105  | -0.0066 | -0.0078 | 0.0166  | -0.0046 | -0.0028 |
| Kidney cancer                   | 0.0147  | 0.0015  | 0.0136  | 0.0214  | 0.0057  | 0.0093  |
| Liver cancer                    | 0.0291  | 0.0372  | 0.0418  | 0.0359  | 0.0372  | 0.0398  |
| Multiple myeloma                | 0.0020  | -0.0056 | 0.0056  | 0.0028  | 0.0009  | 0.0079  |
| Pancreatic cancer               | 0.0102  | 0.0024  | 0.0076  | 0.0126  | 0.0030  | 0.0068  |
| Uterine cancer                  | 0.0395  | 0.0209  | 0.0269  | NA      | NA      | NA      |

Table S3 Annual trends in case fatality rates, by sex and age group

| Cause                           | Male    |         |         | Female  |         |         |
|---------------------------------|---------|---------|---------|---------|---------|---------|
|                                 | 0-34    | 35-64   | 65+     | 0-34    | 35-64   | 65+     |
| Ischaemic heart disease         | -0.0023 | -0.0348 | -0.0503 | 0.0127  | -0.0325 | -0.0467 |
| Ischaemic stroke                | -0.0647 | -0.0424 | -0.0292 | -0.0547 | -0.0320 | -0.0285 |
| Intracerebral haemorrhage       | -0.0234 | -0.0178 | -0.0055 | -0.0142 | -0.0137 | -0.0052 |
| Hypertensive heart disease      | -0.0668 | -0.0200 | 0.0170  | 0.0257  | 0.0088  | 0.0184  |
| Atrial fibrillation and flutter | 0.0091  | -0.0061 | 0.0098  | -0.0174 | -0.0126 | 0.0081  |
| Diabetes mellitus type 2        | -0.0084 | -0.0017 | -0.0048 | -0.0122 | -0.0013 | -0.0038 |
| Breast cancer                   | -0.0055 | -0.0198 | -0.0182 | NA      | NA      | NA      |
| Colon and rectum cancer         | -0.0112 | -0.0094 | -0.0186 | -0.0108 | -0.0117 | -0.0206 |
| Oesophageal cancer              | -0.0117 | -0.0140 | -0.0104 | -0.0058 | -0.0084 | -0.0094 |
| Kidney cancer                   | -0.0060 | -0.0086 | -0.0175 | -0.0046 | -0.0096 | -0.0134 |
| Liver cancer                    | -0.0206 | -0.0110 | -0.0099 | -0.0218 | -0.0201 | -0.0195 |
| Multiple myeloma                | -0.0132 | -0.0078 | -0.0129 | -0.0041 | -0.0083 | -0.0144 |
| Pancreatic cancer               | -0.0133 | -0.0054 | -0.0061 | -0.0068 | -0.0039 | -0.0047 |
| Uterine cancer                  | -0.0197 | -0.0096 | -0.0163 | NA      | NA      | NA      |

## 9. Relative risks of disease

Table S4 Relative risks of modelled obesity-related diseases

| Disease                    | Population subgroup | Units/Category          | Mean relative risk (95% CI) | Source                         |
|----------------------------|---------------------|-------------------------|-----------------------------|--------------------------------|
| Ischaemic heart disease    | 35-44               | per 5kg/m <sup>32</sup> | 1.66 (1.51 to 1.84)         | Singh et al 2013 <sup>11</sup> |
|                            | 45-54               | per 5kg/m <sup>31</sup> | 1.55 (1.46 to 1.64)         |                                |
|                            | 55-64               | per 5kg/m <sup>30</sup> | 1.44 (1.4 to 1.48)          |                                |
|                            | 65-74               | per 5kg/m <sup>29</sup> | 1.35 (1.32 to 1.38)         |                                |
|                            | 75-84               | per 5kg/m <sup>28</sup> | 1.26 (1.2 to 1.32)          |                                |
|                            | 85+                 | per 5kg/m <sup>27</sup> | 1.14 (1.04 to 1.26)         |                                |
| Ischaemic stroke           | 35-44               | per 5kg/m <sup>26</sup> | 1.86 (1.67 to 2.08)         | Singh et al 2013 <sup>11</sup> |
|                            | 45-54               | per 5kg/m <sup>25</sup> | 1.67 (1.53 to 1.81)         |                                |
|                            | 55-64               | per 5kg/m <sup>24</sup> | 1.5 (1.4 to 1.6)            |                                |
|                            | 65-74               | per 5kg/m <sup>23</sup> | 1.35 (1.28 to 1.41)         |                                |
|                            | 75-84               | per 5kg/m <sup>22</sup> | 1.21 (1.16 to 1.26)         |                                |
|                            | 85+                 | per 5kg/m <sup>21</sup> | 1.04 (0.96 to 1.12)         |                                |
| Intracerebral haemorrhage  | 35-44               | per 5kg/m <sup>20</sup> | 2.54 (1.96 to 3.28)         | Singh et al 2013 <sup>11</sup> |
|                            | 45-54               | per 5kg/m <sup>19</sup> | 2.1 (1.66 to 2.66)          |                                |
|                            | 55-64               | per 5kg/m <sup>18</sup> | 1.75 (1.44 to 2.13)         |                                |
|                            | 65-74               | per 5kg/m <sup>17</sup> | 1.48 (1.29 to 1.71)         |                                |
|                            | 75-84               | per 5kg/m <sup>16</sup> | 1.3 (1.21 to 1.4)           |                                |
|                            | 85+                 | per 5kg/m <sup>15</sup> | 1.05 (0.92 to 1.2)          |                                |
| Hypertensive heart disease | 35-44               | per 5kg/m <sup>14</sup> | 2.15 (0.8 to 5.78)          | Singh et al 2013 <sup>11</sup> |
|                            | 45-54               | per 5kg/m <sup>13</sup> | 2.02 (0.97 to 4.21)         |                                |
|                            | 55-64               | per 5kg/m <sup>12</sup> | 1.9 (1.17 to 3.07)          |                                |
|                            | 65-74               | per 5kg/m <sup>11</sup> | 1.81 (1.45 to 2.26)         |                                |
|                            | 75-84               | per 5kg/m <sup>10</sup> | 1.63 (1.53 to 1.74)         |                                |
|                            | 85+                 | per 5kg/m <sup>9</sup>  | 1.45 (1.05 to 2.01)         |                                |
| Diabetes mellitus 2        | 35-44               | per 5kg/m <sup>8</sup>  | 3.07 (2.28 to 4.15)         | Singh et al 2013 <sup>11</sup> |
|                            | 45-54               | per 5kg/m <sup>7</sup>  | 2.66 (2.15 to 3.3)          |                                |
|                            | 55-64               | per 5kg/m <sup>6</sup>  | 2.32 (2.04 to 2.63)         |                                |
|                            | 65-74               | per 5kg/m <sup>5</sup>  | 2.03 (1.95 to 2.11)         |                                |

|                                  |                 |                         |                        |                                     |                                  |
|----------------------------------|-----------------|-------------------------|------------------------|-------------------------------------|----------------------------------|
|                                  | 75-84           | per 5kg/m <sup>4</sup>  | 1.7 (1.61 to 1.79)     |                                     |                                  |
|                                  | 85+             | per 5kg/m <sup>3</sup>  | 1.38 (1.23 to 1.56)    |                                     |                                  |
| Atrial fibrillation and flutter  | –               | per 5kg/m <sup>2</sup>  | 1.28 (1.2 to 1.38)     | Aune et al 2017 <sup>12</sup>       |                                  |
| Gallbladder and biliary diseases | –               | per 5kg/m <sup>1</sup>  | 1.63 (1.49 to 1.78)    | Aune et al 2015 <sup>13</sup>       |                                  |
| Colon and rectum cancer          | –               | per 5kg/m <sup>0</sup>  | 1.05 (1.03 to 1.07)    | WCRF 2018 <sup>14</sup>             |                                  |
| Breast cancer                    | women           | per 5kg/m <sup>1</sup>  | 1.12 (1.09 to 1.15)    | WCRF 2018 <sup>14</sup>             |                                  |
| Uterine cancer                   | women           | per 5kg/m <sup>2</sup>  | 1.54 (1.47 to 1.61)    | Kyrgiou et al 2017 <sup>15</sup>    |                                  |
| Oesophageal cancer               | adeno-carcinoma | per 5kg/m <sup>3</sup>  | 1.54 (1.41 to 1.67)    | Kyrgiou et al 2017 <sup>15</sup>    |                                  |
|                                  |                 | squamous cell carcinoma | per 5kg/m <sup>4</sup> |                                     | 0.63 (0.53 to 0.75)              |
| Kidney cancer                    | men             | per 5kg/m <sup>5</sup>  | 1.24 (1.17 to 1.32)    | Kyrgiou et al 2017 <sup>15</sup>    |                                  |
|                                  | women           | per 5kg/m <sup>6</sup>  | 1.33 (1.25 to 1.42)    |                                     |                                  |
| Pancreatic cancer                | –               | per 5kg/m <sup>2</sup>  | 1.1 (1.06 to 1.14)     | Kyrgiou et al 2017 <sup>15</sup>    |                                  |
| Multiple myeloma                 | –               | per 5kg/m <sup>2</sup>  | 1.12 (1.09 to 1.15)    | Kyrgiou et al 2017 <sup>15</sup>    |                                  |
| Liver cancer                     | –               | per 5kg/m <sup>2</sup>  | 1.3 (1.16 to 1.46)     | WCRF 2018 <sup>14</sup>             |                                  |
| Asthma*                          | <18 years       | Healthy                 | 1                      | Azizpour et al 2018 <sup>16</sup>   |                                  |
|                                  |                 | Overweight              | 1.64 (1.13 to 2.38)    |                                     |                                  |
|                                  |                 | Obese                   | 1.92 (1.39 to 2.65)    |                                     |                                  |
|                                  | 18+ years       | Healthy                 | 1                      |                                     | Beuther et al 2007 <sup>17</sup> |
|                                  |                 | Overweight              | 1.38 (1.17 to 1.62)    |                                     |                                  |
|                                  |                 | Obese                   | 1.92 (1.43 to 2.59)    |                                     |                                  |
| Low back pain*                   | –               | Healthy                 | 1                      | Shiri et al 2010 <sup>18</sup>      |                                  |
|                                  |                 | Overweight              | 1.08 (0.9 to 1.29)     |                                     |                                  |
|                                  |                 | Obese                   | 1.42 (1.11 to 0.181)   |                                     |                                  |
| Osteoarthritis knee*             | 50+ years       | Healthy                 | 1                      | Silverwood et al 2015 <sup>19</sup> |                                  |
|                                  |                 | Overweight              | 1.98 (1.57 to 2.2)     |                                     |                                  |
|                                  |                 | Obese                   | 2.66 (2.15 to 3.28)    |                                     |                                  |
| Osteoarthritis hip*              | –               | per 5kg/m <sup>2</sup>  | 1.11 (1.07 to 1.16)    | Jiang et al 2011 <sup>20</sup>      |                                  |
| Depressive disorders*            | –               | Healthy                 | 1                      | Amiri et al 2018 <sup>21</sup>      |                                  |
|                                  |                 | Overweight              | 1.04 (0.99 to 1.11)    |                                     |                                  |
|                                  |                 | Obese                   | 1.15 (1.06 to 1.25)    |                                     |                                  |

\* Disease included in sensitivity analyses only

Table S5 Relative risk of ischaemic heart disease and ischaemic stroke in people with type 2 diabetes

| Disease                 | Population subgroup | Units/Category | Mean relative risk (95% CI) | Source                          |
|-------------------------|---------------------|----------------|-----------------------------|---------------------------------|
| Ischaemic heart disease | men                 | Diabetes       | 1.85 (1.64 to 2.1)          | Peters et al 2014 <sup>22</sup> |
|                         | women               | Diabetes       | 2.63 (2.27 to 3.06)         |                                 |
| Ischaemic stroke        | men                 | Diabetes       | 1.83 (1.6 to 2.08)          | Peters et al 2014 <sup>23</sup> |
|                         | women               | Diabetes       | 2.28 (1.93 to 2.69)         |                                 |

## 10. Utility weights

Table S6 Disease-specific utility weights, estimated for the UK by Sullivan et al<sup>24</sup>

| Disease                              | ICD9 code  | Mean utility (SD) |
|--------------------------------------|------------|-------------------|
| Ischaemic heart disease incidence    | icd410     | -0.063 (0.013)    |
| Ischaemic heart disease prevalence   | icd412     | -0.037 (0.026)    |
| Ischaemic stroke incidence           | icd436     | -0.117 (0.012)    |
| Ischaemic stroke prevalence          | icd438     | -0.073 (0.024)    |
| Intracerebral haemorrhage incidence  | icd436     | -0.117 (0.012)    |
| Intracerebral haemorrhage prevalence | icd438     | -0.073 (0.024)    |
| Hypertensive heart disease           | icd401     | -0.046 (0.004)    |
| Diabetes mellitus type 2             | icd250     | -0.071 (0.005)    |
| Atrial fibrillation and flutter      | icd427     | -0.038 (0.007)    |
| Colon and rectum cancer              | icd153     | -0.067 (0.017)    |
| Breast cancer                        | icd174     | -0.019 (0.014)    |
| Uterine cancer                       | icd202     | -0.010 (0.026)    |
| Oesophageal cancer                   | icd202     | -0.010 (0.026)    |
| Kidney cancer                        | icd189     | -0.048 (0.041)    |
| Pancreatic cancer                    | icd202     | -0.010 (0.026)    |
| Multiple myeloma                     | icd195     | -0.086 (0.027)    |
| Liver cancer                         | icd155     | -0.093 (0.044)    |
| Asthma                               | icd493     | -0.046 (0.006)    |
| Low back pain                        | icd724     | -0.087 (0.006)    |
| Osteoarthritis hip                   | icd715     | -0.114 (0.008)    |
| Osteoarthritis knee                  | icd715     | -0.114 (0.008)    |
| Depressive disorders                 | icd296     | -0.127 (0.010)    |
| Dental caries                        | icd521     | -0.002 (0.012)    |
| Gallbladder and biliary diseases     | icd574-76* | -0.062 (0.018)    |

\* weighted by Hospital Episode Statistics admissions primary diagnosis for ICD10 K80-83.<sup>25</sup>

Table S7 Parameters for estimating background utility weight, , estimated for the UK by Sullivan et al<sup>24</sup>

| Parameter              | Mean utility (SD)  |
|------------------------|--------------------|
| Age (continuous years) | -0.00027 (0.00017) |
| Male                   | 0.0010 (0.00063)   |
| Age 10-19              | 0.913 (0.0045)     |
| Age 20-29              | 0.905 (0.0021)     |
| Age 30-39              | 0.879 (0.0021)     |
| Age 40-49              | 0.837 (0.0028)     |
| Age 50-59              | 0.798 (0.0035)     |
| Age 60-69              | 0.774 (0.0039)     |
| Age 70-79              | 0.723 (0.0049)     |
| Age 80-89              | 0.657 (0.0075)     |

## 11. Disease costs

Table S8 Costs of treatment in the National Health Service

| Condition                        | Units          | Mean cost (SD)*  |
|----------------------------------|----------------|------------------|
| Dental caries                    | dmft/DMFT**    | £85 (£17)        |
| Ischaemic heart disease          | prevalent case | £606 (£121)      |
| Ischaemic stroke                 | prevalent case | £1,950 (£390)    |
| Intracerebral haemorrhage        | prevalent case | £2,563 (£513)    |
| Hypertensive heart disease       | prevalent case | £103 (£21)       |
| Diabetes mellitus type 2         | prevalent case | £187 (£37)       |
| Atrial fibrillation and flutter  | prevalent case | £195 (£39)       |
| Colon and rectum cancer          | incident case  | £9,204 (£1,841)  |
| Breast cancer                    | incident case  | £12,433 (£2,487) |
| Uterine cancer                   | incident case  | £2,060 (£412)    |
| Oesophageal cancer               | incident case  | £2,421 (£484)    |
| Kidney cancer                    | incident case  | £4,979 (£996)    |
| Pancreatic cancer                | incident case  | £2,695 (£539)    |
| Multiple myeloma                 | incident case  | £22,915 (£4,583) |
| Liver cancer                     | incident case  | £2,172 (£434)    |
| Asthma                           | incident case  | £4,186 (£837)    |
| Low back pain                    | incident case  | £425 (£85)       |
| Osteoarthritis hip               | incident case  | £13,951 (£2,790) |
| Osteoarthritis knee              | incident case  | £1,799 (£360)    |
| Depressive disorders             | incident case  | £410 (£82)       |
| Gallbladder and biliary diseases | incident case  | £372 (£74)       |
| Total non-modelled diseases      | person         | £1,099 (£220)    |

\* Standard deviation estimated as 20% of point estimate.

\*\* Decayed missing and filled deciduous (dmft) and permanent (DMFT) teeth.

## References

1. University of California Berkeley (USA), Max Planck Institute for Demographic Research (Germany). Human Mortality Database [Available from: <https://www.mortality.org> accessed 5 May 2021.
2. Office for National Statistics. 2016-based National Population Projections 2017 [Available from: <https://www.ons.gov.uk/peoplepopulationandcommunity/populationandmigration/populationprojections/datasets/z3zippedpopulationprojectionsdatafilesengland> accessed 1 September 2020.
3. Cobiac LJ, Scarborough P. Modelling future trajectories of obesity and body mass index in England. *PLoS ONE* 2021;16(6):e0252072. doi: 10.1371/journal.pone.0252072
4. Adult Dental Health Survey, 2009. UK Data Service. Available from: <http://doi.org/10.5255/UKDA-SN-6884-22012>.
5. Children's Dental Health Survey, 2013. UK Data Service. Available from: <http://doi.org/10.5255/UKDA-SN-7774-12015>.
6. Khalaf K, Miskelly J, Voge E, et al. Prevalence of hypodontia and associated factors: a systematic review and meta-analysis. *J Orthod* 2014;41(4):299-316.
7. McCaul L, Jenkins W, Kay E. The reasons for the extraction of various tooth types in Scotland: a 15-year follow up. *J Dent* 2001;29(6):401-07.
8. Richards W, Ameen J, Coll A, et al. Reasons for tooth extraction in four general dental practices in South Wales. *Br Dent J* 2005;198(5):275-78.
9. Global Burden of Disease Study 2015 (GBD 2015) Data Resources: Institute for Health Metrics and Evaluation, University of Washington; 2016 [Available from: <http://ghdx.healthdata.org/gbd-2015> accessed 12 December 2016 2016.
10. Jackson C. disbayes [Available from: <https://github.com/chjackson/disbayes> accessed 5 May 2021.
11. Singh GM, Danaei G, Farzadfar F, et al. The age-specific quantitative effects of metabolic risk factors on cardiovascular diseases and diabetes: a pooled analysis. *PLoS ONE* 2013;8(7):e65174.
12. Aune D, Sen A, Schlesinger S, et al. Body mass index, abdominal fatness, fat mass and the risk of atrial fibrillation: a systematic review and dose–response meta-analysis of prospective studies. *Eur J Epidemiol* 2017;32(3):181-92.
13. Aune D, Norat T, Vatten LJ. Body mass index, abdominal fatness and the risk of gallbladder disease. *Eur J Epidemiol* 2015;30(9):1009-19.

14. World Cancer Research Fund. Diet, Nutrition, Physical Activity and Cancer: a Global Perspective, Third Expert Report: World Cancer Research Fund; American Institute for Cancer Research, 2018.
15. Kyrgiou M, Kalliala I, Markozannes G, et al. Adiposity and cancer at major anatomical sites: umbrella review of the literature. *Bmj* 2017;356
16. Azizpour Y, Delpisheh A, Montazeri Z, et al. Effect of childhood BMI on asthma: a systematic review and meta-analysis of case-control studies. *BMC Pediatr* 2018;18(1):1-13.
17. Beuther DA, Sutherland ER. Overweight, obesity, and incident asthma: a meta-analysis of prospective epidemiologic studies. *Am J Respir Crit Care Med* 2007;175(7):661-66.
18. Shiri R, Karppinen J, Leino-Arjas P, et al. The association between obesity and low back pain: a meta-analysis. *Am J Epidemiol* 2010;171(2):135-54.
19. Silverwood V, Blagojevic-Bucknall M, Jinks C, et al. Current evidence on risk factors for knee osteoarthritis in older adults: a systematic review and meta-analysis. *Osteoarthritis Cartilage* 2015;23(4):507-15.
20. Jiang L, Rong J, Wang Y, et al. The relationship between body mass index and hip osteoarthritis: a systematic review and meta-analysis. *Joint Bone Spine* 2011;78(2):150-55.
21. Amiri S, Behnezhad S, Nadinlui KB. Body Mass Index (BMI) and risk of depression in adults: A systematic review and meta-analysis of longitudinal studies. *Obesity Medicine* 2018;12:1-12.
22. Peters SA, Huxley RR, Woodward M. Diabetes as risk factor for incident coronary heart disease in women compared with men: a systematic review and meta-analysis of 64 cohorts including 858,507 individuals and 28,203 coronary events. *Diabetologia* 2014;57(8):1542-51.
23. Peters SA, Huxley RR, Woodward M. Diabetes as a risk factor for stroke in women compared with men: a systematic review and meta-analysis of 64 cohorts, including 775 385 individuals and 12 539 strokes. *Lancet* 2014;383(9933):1973-80.
24. Sullivan PW, Slejko JF, Sculpher MJ, et al. Catalogue of EQ-5D scores for the United Kingdom. *Med Decis Making* 2011;31(6):800-04.
25. NHS Digital. Hospital Episode Statistics for England: Admitted Patient Care statistics, 2019-20 2020 [Available from: <https://digital.nhs.uk/data-and-information/publications/statistical/hospital-admitted-patient-care-activity/2019-20> accessed 21 April 2021.
