# Supplementary material for: Population health and health sector cost impacts of the UK Soft Drinks Industry Levy: a modelling study
Source: bioRxiv or medRxiv preprint supplement (doi:10.1101/2023.10.05.23296619), 2023-10-07
Supplement: Supplementary file [file media-2.pdf]

## Text S2 – Additional results

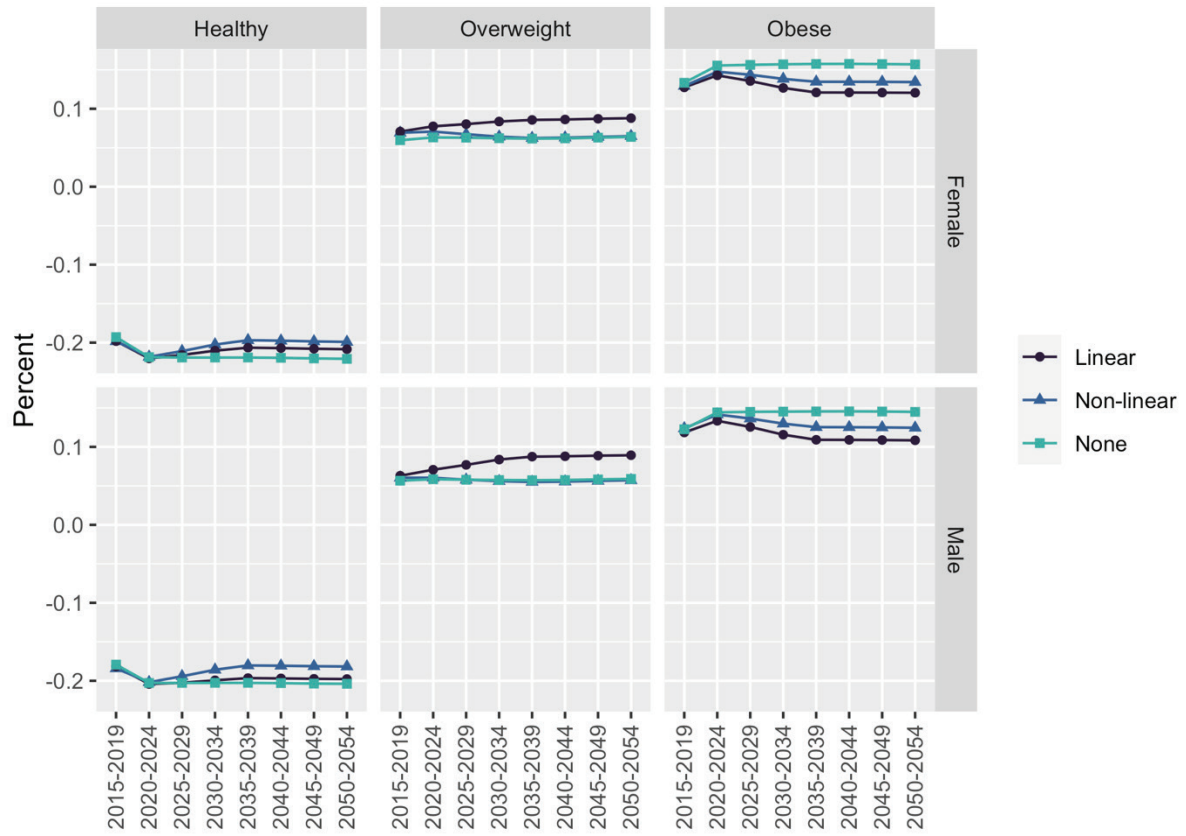

Figure S1 Sensitivity of predicted prevalence of overweight and obesity to the choice of BMI projection model (described in Table 1)

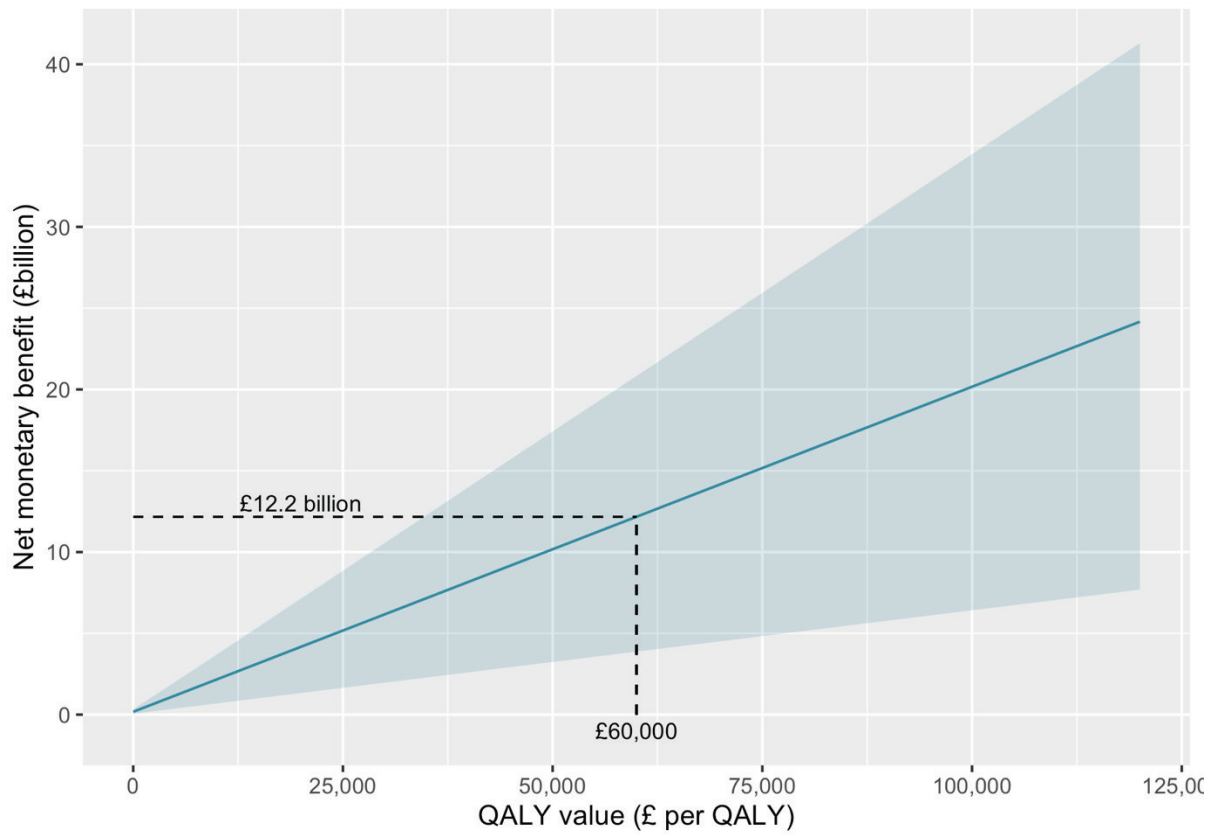

Figure S2 Net monetary benefit against the willingness-to-pay threshold (UK Treasury recommends a value of £60,000 per QALY)
